# Supplementary material
Source: PubMed Central journal article supplement (PMC3968406)

1 **SUPPLEMENTAL FIGURE LEGENDS**

2

3 **Supplemental Figure 1. *Rev-erb $\alpha$*  mRNA expression in different tissues.** Relative mRNA  
4 expression of *Rev-erb $\alpha$*  in the liver, the hippocampus (HIP), the ventral tegmental area (VTA), and the  
5 striatum (ST) of WT mice at 1PM and 5AM. Data are the mean  $\pm$  s.e.m. (Student's *t* test, \**P*<0.01 and  
6 \*\**P*<0.001 vs. 1PM same tissue, n=4-7).

7

8 **Supplemental Figure 2. *Th* mRNA expression in different part of the brain.** Relative mRNA  
9 expression of *Th* in the striatum (ST), frontal cortex (FC), and hypothalamus (HYPO) of WT and *Rev-*  
10 *erb $\alpha$*  KO mice. Data are the mean  $\pm$  s.e.m. (n=5).

11

12 **Supplemental Figure 3. Nuclear receptor mRNA expression in the ventral tegmental area.**  
13 Relative mRNA expression of *Nor1*, *Nur77*, and *Nurr1* in the ventral tegmental area (VTA) of WT  
14 and *Rev-erb $\alpha$*  KO mice. Data are the mean  $\pm$  s.e.m. (n=6).

# Supplemental Figure 1

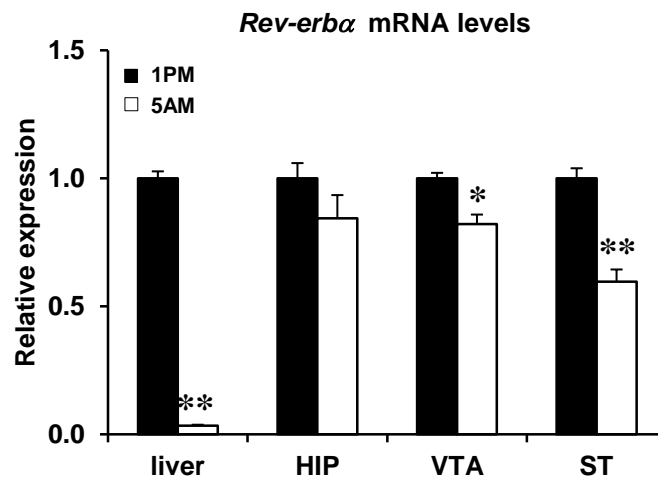

## Supplemental Figure 2

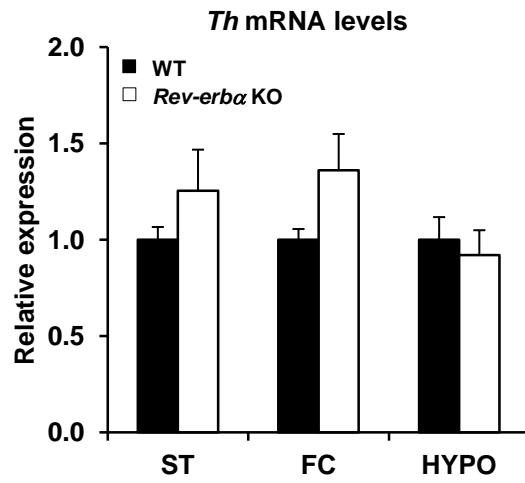

### Supplemental Figure 3

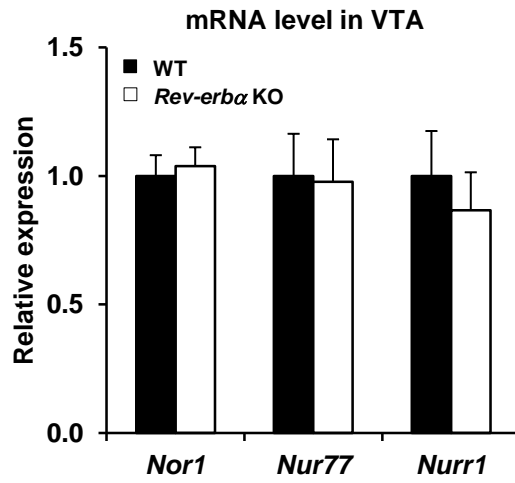

Supplement: me-13-1351.pdf [file me-13-1351.pdf]
